# Supplementary material for: Ultrathin nanoclay films with tunable thickness as barrier layers in organic light emitting devices
Source: Royal Society of Chemistry journal article supplement (doi:10.1039/c2jm00047d), 2012-01-01
Supplement: c2jm00047d.pdf [file c2jm00047d.pdf]

## Supplementary Information

### Ultrathin Nanoclay Films with Tunable Thickness as Barrier

### Layers in Organic Light Emitting Devices

Jung Kyu Kim, Hyo Suk Park, Suk-Jin Ham, Kwang-Jik Lee, Pil J. Yoo and Jong Hyeok Park

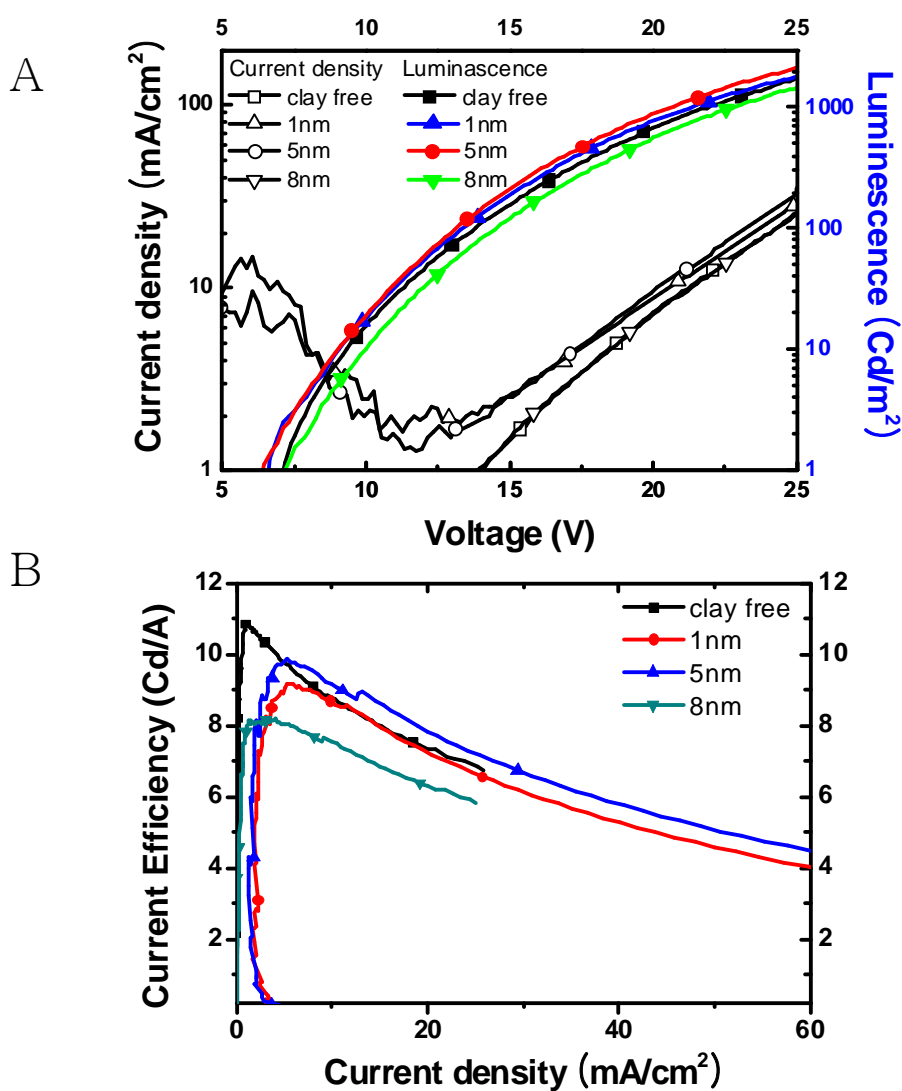

Figure S1. Initial Current density-Voltage-Luminescence curves (a) and Current efficiency-Current density curves (b).

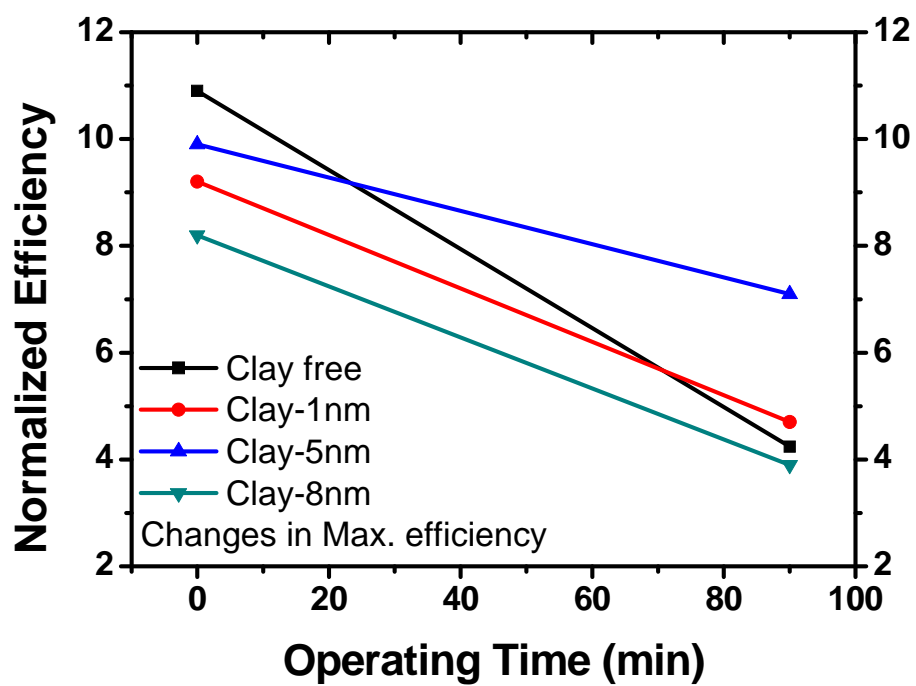

Figure S2. Decay behaviors of absolute maximum LE of devices.
